# Supplementary material for: Modular Characteristics and Mechanism of Action of Herbs for Endometriosis Treatment in Chinese Medicine: A Data Mining and Network Pharmacology–Based Identification
Source: Front Pharmacol. 2020 Mar 6;11:147. doi: 10.3389/fphar.2020.00147 (PMC7069061; doi:10.3389/fphar.2020.00147)
Supplement: Supplementary Table 5 — The Chinese herbs associated targets names. [file Table_5.xlsx]

## Sheet: Sheet1
Table 5: The Chinese herbs associated targets names
GENE_SYMBOL	Gene names
AADAT	aminoadipate aminotransferase
AARS	alanyl-tRNA synthetase
ABAT	4-aminobutyrate aminotransferase
ABCA2	ATP-binding cassette, sub-family A (ABC1), member 2
ABCC2	ATP-binding cassette, sub-family C (CFTR/MRP), member 2
ABHD12	abhydrolase domain containing 12
ABHD12B	abhydrolase domain containing 12B
ABHD13	abhydrolase domain containing 13
ACAA1	acetyl-Coenzyme A acyltransferase 1
ACACA	acetyl-Coenzyme A carboxylase alpha
ACADSB	acyl-Coenzyme A dehydrogenase, short/branched chain
ACHE	acetylcholinesterase (Yt blood group)
ACOT1	acyl-CoA thioesterase 1
ACOT2	acyl-CoA thioesterase 2
ACOT4	acyl-CoA thioesterase 4; similar to peroxisomal long-chain acyl-coA thioesterase
ACOT6	acyl-CoA thioesterase 6
ACPP	acid phosphatase, prostate
ACTB	actin, beta
ACY1	aminoacylase 1
ADA	adenosine deaminase
ADCY2	adenylate cyclase 2 (brain)
ADCY8	adenylate cyclase 8 (brain)
ADH1A	alcohol dehydrogenase 1B (class I), beta polypeptide; alcohol dehydrogenase 1A (class I), alpha polypeptide; alcohol dehydrogenase 1C (class I), gamma polypeptide
ADH1B	alcohol dehydrogenase 1B (class I), beta polypeptide; alcohol dehydrogenase 1A (class I), alpha polypeptide; alcohol dehydrogenase 1C (class I), gamma polypeptide
ADH1C	alcohol dehydrogenase 1B (class I), beta polypeptide; alcohol dehydrogenase 1A (class I), alpha polypeptide; alcohol dehydrogenase 1C (class I), gamma polypeptide
ADH7	alcohol dehydrogenase 7 (class IV), mu or sigma polypeptide
ADRA1A	adrenergic, alpha-1A-, receptor
ADRA1B	adrenergic, alpha-1B-, receptor
ADRA1D	adrenergic, alpha-1D-, receptor
ADRA2A	adrenergic, alpha-2A-, receptor
ADRA2B	adrenergic, alpha-2B-, receptor
ADRA2C	adrenergic, alpha-2C-, receptor
ADRB1	adrenergic, beta-1-, receptor
ADRB2	adrenergic, beta-2-, receptor, surface
ADSSL1	adenylosuccinate synthase like 1
AGXT	alanine-glyoxylate aminotransferase
AGXT2	alanine-glyoxylate aminotransferase 2
AHR	aryl hydrocarbon receptor
AHSA1	AHA1, activator of heat shock 90kDa protein ATPase homolog 1 (yeast)
AKR1B1	aldo-keto reductase family 1, member B1 (aldose reductase)
AKR1C1	aldo-keto reductase family 1, member C1 (dihydrodiol dehydrogenase 1; 20-alpha (3-alpha)-hydroxysteroid dehydrogenase)
AKR1C3	aldo-keto reductase family 1, member C3 (3-alpha hydroxysteroid dehydrogenase, type II)
AKT1	v-akt murine thymoma viral oncogene homolog 1
ALAS1	aminolevulinate, delta-, synthase 1
ALAS2	aminolevulinate, delta-, synthase 2
ALB	albumin
ALDH18A1	aldehyde dehydrogenase 18 family, member A1
ALDH1A1	aldehyde dehydrogenase 1 family, member A1
ALDH1B1	aldehyde dehydrogenase 1 family, member B1
ALDH2	aldehyde dehydrogenase 2 family (mitochondrial)
ALDH4A1	aldehyde dehydrogenase 4 family, member A1
ALDH5A1	aldehyde dehydrogenase 5 family, member A1
ALDH9A1	aldehyde dehydrogenase 9 family, member A1
ALOX12	arachidonate 12-lipoxygenase
ALOX5	arachidonate 5-lipoxygenase
AMY2A	amylase, alpha 2A (pancreatic)
ANXA3	annexin A3
AOC3	amine oxidase, copper containing 3 (vascular adhesion protein 1)
APAF1	apoptotic peptidase activating factor 1
APOA1	apolipoprotein A-I
APOB	apolipoprotein B (including Ag(x) antigen)
APOD	apolipoprotein D
APP	amyloid beta (A4) precursor protein
AR	androgen receptor
ARG2	arginase, type II
ASL	argininosuccinate lyase
ATP2C1	ATPase, Ca++ transporting, type 2C, member 1
AZIN1	antizyme inhibitor 1
B4GALT1	UDP-Gal:betaGlcNAc beta 1,4- galactosyltransferase, polypeptide 1
BAAT	bile acid Coenzyme A: amino acid N-acyltransferase (glycine N-choloyltransferase)
BAK1	BCL2-antagonist/killer 1; BCL2-like 7 pseudogene 1
BAP1	BRCA1 associated protein-1 (ubiquitin carboxy-terminal hydrolase)
BARD1	BRCA1 associated RING domain 1
BAX	BCL2-associated X protein
BCHE	butyrylcholinesterase
BCL2	B-cell CLL/lymphoma 2
BCL2L1	BCL2-like 1
BDNF	brain-derived neurotrophic factor
BHMT2	betaine-homocysteine methyltransferase 2
BID	BH3 interacting domain death agonist
BIK	BCL2-interacting killer (apoptosis-inducing)
BIRC5	baculoviral IAP repeat-containing 5
BMF	Bcl2 modifying factor
BOK	BCL2-related ovarian killer
BTK	Bruton agammaglobulinemia tyrosine kinase
C5AR1	complement component 5a receptor 1
CA2	carbonic anhydrase II
CALCR	calcitonin receptor
CASP3	caspase 3, apoptosis-related cysteine peptidase
CASP7	caspase 7, apoptosis-related cysteine peptidase
CASP8	caspase 8, apoptosis-related cysteine peptidase
CASP9	caspase 9, apoptosis-related cysteine peptidase
CAT	catalase
CAV1	caveolin 1, caveolae protein, 22kDa
CCK	cholecystokinin
CCL13	chemokine (C-C motif) ligand 13
CCNA2	cyclin A2
CCNB1	cyclin B1
CCND1	cyclin D1
CD40LG	CD40 ligand
CD5L	CD5 molecule-like
CD80	CD80 molecule
CD86	CD86 molecule
CDC25B	cell division cycle 25 homolog B (S. pombe)
CDK13	cell division cycle 2-like 5 (cholinesterase-related cell division controller)
CDK4	cyclin-dependent kinase 4
CDKN1A	cyclin-dependent kinase inhibitor 1A (p21, Cip1)
CDKN3	cyclin-dependent kinase inhibitor 3
CETP	cholesteryl ester transfer protein, plasma
CHDH	choline dehydrogenase
CHEK1	CHK1 checkpoint homolog (S. pombe)
CHEK2	protein kinase CHK2-like; CHK2 checkpoint homolog (S. pombe); similar to hCG1983233
CHRM1	cholinergic receptor, muscarinic 1
CHRM2	cholinergic receptor, muscarinic 2
CHRM3	cholinergic receptor, muscarinic 3
CHRM4	cholinergic receptor, muscarinic 4
CHRM5	cholinergic receptor, muscarinic 5
CHRNA2	cholinergic receptor, nicotinic, alpha 2 (neuronal)
CHRNA7	CHRNA7 (cholinergic receptor, nicotinic, alpha 7, exons 5-10) and FAM7A (family with sequence similarity 7A, exons A-E) fusion; cholinergic receptor, nicotinic, alpha 7
CHUK	conserved helix-loop-helix ubiquitous kinase
CITED1	Cbp/p300-interacting transactivator, with Glu/Asp-rich carboxy-terminal domain, 1
CKM	creatine kinase, muscle
CLDN4	claudin 4
CLYBL	citrate lyase beta like
CMBL	carboxymethylenebutenolidase homolog (Pseudomonas)
COL1A1	collagen, type I, alpha 1
COL3A1	collagen, type III, alpha 1
COL7A1	collagen, type VII, alpha 1
COMT	catechol-O-methyltransferase
COX5A	cytochrome c oxidase subunit Va
CPB2	carboxypeptidase B2 (plasma)
CPT1A	carnitine palmitoyltransferase 1A (liver)
CRAT	carnitine acetyltransferase
CRP	C-reactive protein, pentraxin-related
CRYZ	crystallin, zeta (quinone reductase)
CTNNB1	catenin (cadherin-associated protein), beta 1, 88kDa
CTSD	cathepsin D
CXCL1	chemokine (C-X-C motif) ligand 1 (melanoma growth stimulating activity, alpha)
CXCL10	chemokine (C-X-C motif) ligand 10
CXCL11	chemokine (C-X-C motif) ligand 11
CXCL2	chemokine (C-X-C motif) ligand 2
CXCL3	chemokine (C-X-C motif) ligand 3
CYCS	cytochrome c, somatic
CYP19A1	cytochrome P450, family 19, subfamily A, polypeptide 1
CYP1A1	cytochrome P450, family 1, subfamily A, polypeptide 1
CYP1A2	cytochrome P450, family 1, subfamily A, polypeptide 2
CYP1B1	cytochrome P450, family 1, subfamily B, polypeptide 1
CYP21A2	cytochrome P450, family 21, subfamily A, polypeptide 2
CYP2A6	cytochrome P450, family 2, subfamily A, polypeptide 6
CYP2C8	cytochrome P450, family 2, subfamily C, polypeptide 8
CYP2D6	cytochrome P450, family 2, subfamily D, polypeptide 6
CYP2E1	cytochrome P450, family 2, subfamily E, polypeptide 1
CYP3A4	cytochrome P450, family 3, subfamily A, polypeptide 4
CYP3A43	cytochrome P450, family 3, subfamily A, polypeptide 43
DCAF5	WD repeat domain 22
DECR1	2,4-dienoyl CoA reductase 1, mitochondrial
DHCR7	7-dehydrocholesterol reductase
DHFR	dihydrofolate reductase
DHODH	dihydroorotate dehydrogenase
DIO1	deiodinase, iodothyronine, type I
DNPEP	aspartyl aminopeptidase
DPP4	dipeptidyl-peptidase 4
DRD1	dopamine receptor D1
DRD2	dopamine receptor D2
DRD3	dopamine receptor D3
DRD5	dopamine receptor D5
DUOX2	dual oxidase 2
E2F1	E2F transcription factor 1
E2F2	E2F transcription factor 2
ECE1	endothelin converting enzyme 1
EDN1	endothelin 1
EGF	epidermal growth factor (beta-urogastrone)
EGFR	epidermal growth factor receptor (erythroblastic leukemia viral (v-erb-b) oncogene homolog, avian)
EGLN1	egl nine homolog 1 (C. elegans)
EIF3L	eukaryotic translation initiation factor 3, subunit L
ELANE	elastase, neutrophil expressed
ELK1	ELK1, member of ETS oncogene family
ENOX1	ecto-NOX disulfide-thiol exchanger 1
ENPEP	glutamyl aminopeptidase (aminopeptidase A)
EP300	E1A binding protein p300
ERBB2	v-erb-b2 erythroblastic leukemia viral oncogene homolog 2, neuro/glioblastoma derived oncogene homolog (avian)
ERBB3	v-erb-b2 erythroblastic leukemia viral oncogene homolog 3 (avian)
ESR1	estrogen receptor 1
ESR2	estrogen receptor 2 (ER beta)
F10	coagulation factor X
F13A1	coagulation factor XIII, A1 polypeptide
F2	coagulation factor II (thrombin)
F3	coagulation factor III (thromboplastin, tissue factor)
F7	coagulation factor VII (serum prothrombin conversion accelerator)
FABP1	fatty acid binding protein 1, liver
FABP5	fatty acid binding protein 5-like 2; fatty acid binding protein 5 (psoriasis-associated); fatty acid binding protein 5-like 8; fatty acid binding protein 5-like 7; fatty acid binding protein 5-like 9
FASLG	Fas ligand (TNF superfamily, member 6)
FASN	fatty acid synthase
FCER2	Fc fragment of IgE, low affinity II, receptor for (CD23)
FKBP1A	FK506 binding protein 1A, 12kDa
FOLH1	folate hydrolase (prostate-specific membrane antigen) 1
FOS	v-fos FBJ murine osteosarcoma viral oncogene homolog
FTMT	ferritin mitochondrial
G6PD	glucose-6-phosphate dehydrogenase
GABBR1	gamma-aminobutyric acid (GABA) B receptor, 1
GABRA1	gamma-aminobutyric acid (GABA) A receptor, alpha 1
GABRA2	gamma-aminobutyric acid (GABA) A receptor, alpha 2
Gabra3	gamma-aminobutyric acid (GABA) A receptor, alpha 3
GABRA5	gamma-aminobutyric acid (GABA) A receptor, alpha 5
GABRA6	gamma-aminobutyric acid (GABA) A receptor, alpha 6
GABRB1	gamma-aminobutyric acid (GABA) A receptor, beta 1
GABRB3	gamma-aminobutyric acid (GABA) A receptor, beta 3
GABRE	gamma-aminobutyric acid (GABA) A receptor, epsilon
GABRG3	gamma-aminobutyric acid (GABA) A receptor, gamma 3
GADD45A	growth arrest and DNA-damage-inducible, alpha
GAP43	growth associated protein 43
GARS	glycyl-tRNA synthetase
GATM	glycine amidinotransferase (L-arginine:glycine amidinotransferase)
GBA2	glucosidase, beta (bile acid) 2
GCAT	glycine C-acetyltransferase (2-amino-3-ketobutyrate coenzyme A ligase)
GCG	glucagon
GCH1	GTP cyclohydrolase 1
GCLM	glutamate-cysteine ligase, modifier subunit
GFAP	glial fibrillary acidic protein
GGT5	gamma-glutamyltransferase 5
GHRHR	growth hormone releasing hormone receptor
GJA1	gap junction protein, alpha 1, 43kDa
GLDC	glycine dehydrogenase (decarboxylating)
GLIPR2	GLI pathogenesis-related 2
GLRA1	glycine receptor, alpha 1
GLRA3	glycine receptor, alpha 3
GLS2	glutaminase 2 (liver, mitochondrial)
GLUD1	glutamate dehydrogenase 1
GLUD2	glutamate dehydrogenase 2
GLYAT	glycine-N-acyltransferase
GNMT	glycine N-methyltransferase
GOT2	glutamic-oxaloacetic transaminase 2, mitochondrial (aspartate aminotransferase 2)
GPHN	gephyrin
GRIK2	glutamate receptor, ionotropic, kainate 2
GRIN1	glutamate receptor, ionotropic, N-methyl D-aspartate 1
GRIN2C	glutamate receptor, ionotropic, N-methyl D-aspartate 2C
GRIN3A	glutamate receptor, ionotropic, N-methyl-D-aspartate 3A
GSK3B	glycogen synthase kinase 3 beta
GSTA1	glutathione S-transferase alpha 1
GSTA2	glutathione S-transferase alpha 2
GSTM1	glutathione S-transferase mu 1
GSTM2	glutathione S-transferase mu 2 (muscle)
GSTM4	glutathione S-transferase mu 4
GSTO1	glutathione S-transferase omega 1
GSTP1	glutathione S-transferase pi 1
GUSB	glucuronidase, beta
GUSBP1	glucuronidase, beta-like 2; glucuronidase, beta pseudogene
HAGH	hydroxyacylglutathione hydrolase
HARS	histidyl-tRNA synthetase
HAS2	hyaluronan synthase 2
HEY1	hairy/enhancer-of-split related with YRPW motif 1
HIF1A	hypoxia inducible factor 1, alpha subunit (basic helix-loop-helix transcription factor)
HIRA	HIR histone cell cycle regulation defective homolog A (S. cerevisiae)
HK2	hexokinase 2 pseudogene; hexokinase 2
HMGCR	3-hydroxy-3-methylglutaryl-Coenzyme A reductase
HMOX1	heme oxygenase (decycling) 1
HNF4A	hepatocyte nuclear factor 4, alpha
HSD17B1	hydroxysteroid (17-beta) dehydrogenase 1
HSD17B8	hydroxysteroid (17-beta) dehydrogenase 8
HSD3B1	hydroxy-delta-5-steroid dehydrogenase, 3 beta- and steroid delta-isomerase 1
HSF1	heat shock transcription factor 1
HSP90AB1	heat shock protein 90kDa alpha (cytosolic), class B member 1
HSPA5	hypothetical gene supported by AF216292; NM_005347; heat shock 70kDa protein 5 (glucose-regulated protein, 78kDa)
HSPB1	heat shock 27kDa protein-like 2 pseudogene; heat shock 27kDa protein 1
HTR1A	5-hydroxytryptamine (serotonin) receptor 1A
HTR2A	5-hydroxytryptamine (serotonin) receptor 2A
HTR2C	5-hydroxytryptamine (serotonin) receptor 2C
HTR3A	5-hydroxytryptamine (serotonin) receptor 3A
ICAM1	intercellular adhesion molecule 1
IFNB1	interferon, beta 1, fibroblast
IFNG	interferon, gamma
IGF1	insulin-like growth factor 1 (somatomedin C)
IGF1R	insulin-like growth factor 1 receptor
IGF2	insulin-like growth factor 2 (somatomedin A); insulin; INS-IGF2 readthrough transcript
IGFBP3	insulin-like growth factor binding protein 3
IGHG1	immunoglobulin heavy constant gamma 1 (G1m marker); immunoglobulin heavy constant mu; immunoglobulin heavy variable 3-7; immunoglobulin heavy constant gamma 3 (G3m marker); immunoglobulin heavy variable 3-11 (gene/pseudogene); immunoglobulin heavy variable 4-31; immunoglobulin heavy locus
IGHG2	immunoglobulin heavy constant gamma 2 (G2m marker)
IKBKB	inhibitor of kappa light polypeptide gene enhancer in B-cells, kinase beta
IKBKG	inhibitor of kappa light polypeptide gene enhancer in B-cells, kinase gamma
IL10	interleukin 10
IL1b	interleukin 1, beta
IL2	interleukin 2
IL4	interleukin 4
IL4R	interleukin 4 receptor
IL6	interleukin 6 (interferon, beta 2)
IL8	interleukin 8
INS	insulin-like growth factor 2 (somatomedin A); insulin; INS-IGF2 readthrough transcript
INSR	insulin receptor
IRF1	interferon regulatory factor 1
IRF3	interferon regulatory factor 3
ITGB2	integrin, beta 2 (complement component 3 receptor 3 and 4 subunit)
ITGB3	integrin, beta 3 (platelet glycoprotein IIIa, antigen CD61)
ITPK1	inositol 1,3,4-triphosphate 5/6 kinase
IVL	involucrin
JAK1	Janus kinase 1
JUN	jun oncogene
KCNA4	potassium voltage-gated channel, shaker-related subfamily, member 4
KCNMA1	potassium large conductance calcium-activated channel, subfamily M, alpha member 1
KDR	kinase insert domain receptor (a type III receptor tyrosine kinase)
LARS	leucyl-tRNA synthetase
LBP	lipopolysaccharide binding protein
LCMT1	leucine carboxyl methyltransferase 1
LCT	lactase
LDHA	lactate dehydrogenase A
LPL	lipoprotein lipase
LRP1	low density lipoprotein-related protein 1 (alpha-2-macroglobulin receptor)
LRP5	low density lipoprotein receptor-related protein 5
LTA4H	leukotriene A4 hydrolase
MAN2A1	mannosidase, alpha, class 2A, member 1
MAOA	monoamine oxidase A
MAOB	monoamine oxidase B
MAP1S	microtubule-associated protein 1S
MAPK1	mitogen-activated protein kinase 1
MAPK14	mitogen-activated protein kinase 14
MAPK3	hypothetical LOC100271831; mitogen-activated protein kinase 3
MAPK8	mitogen-activated protein kinase 8
MARS	methionyl-tRNA synthetase
MAT1A	methionine adenosyltransferase I, alpha
MAT2A	methionine adenosyltransferase II, alpha
MCAT	malonyl CoA:ACP acyltransferase (mitochondrial)
MCL1	myeloid cell leukemia sequence 1 (BCL2-related)
MDM2	Mdm2 p53 binding protein homolog (mouse)
ME1	malic enzyme 1, NADP(+)-dependent, cytosolic
MET	met proto-oncogene (hepatocyte growth factor receptor)
MGAM	maltase-glucoamylase (alpha-glucosidase)
MGMT	O-6-methylguanine-DNA methyltransferase
MGST1	microsomal glutathione S-transferase 1
MKI67	antigen identified by monoclonal antibody Ki-67
MMP1	matrix metallopeptidase 1 (interstitial collagenase)
MMP10	matrix metallopeptidase 10 (stromelysin 2)
MMP12	matrix metallopeptidase 12 (macrophage elastase)
MMP2	matrix metallopeptidase 2 (gelatinase A, 72kDa gelatinase, 72kDa type IV collagenase)
MMP3	matrix metallopeptidase 3 (stromelysin 1, progelatinase)
MMP8	matrix metallopeptidase 8 (neutrophil collagenase)
MMP9	matrix metallopeptidase 9 (gelatinase B, 92kDa gelatinase, 92kDa type IV collagenase)
MPO	myeloperoxidase
MT2A	metallothionein 2A
MTTP	microsomal triglyceride transfer protein
MUC1	mucin 1, cell surface associated
MUT	methylmalonyl Coenzyme A mutase
MYB	v-myb myeloblastosis viral oncogene homolog (avian)
MYC	v-myc myelocytomatosis viral oncogene homolog (avian)
NA	neurocanthocytosis
NAGS	N-acetylglutamate synthase
NCF1	neutrophil cytosolic factor 1; neutrophil cytosolic factor 1C pseudogene
Ncoa1	nuclear receptor coactivator 1
NCOA2	nuclear receptor coactivator 2
NDUFS1	NADH dehydrogenase (ubiquinone) Fe-S protein 1, 75kDa (NADH-coenzyme Q reductase)
NDUFS8	NADH dehydrogenase (ubiquinone) Fe-S protein 8, 23kDa (NADH-coenzyme Q reductase)
NDUFV1	NADH dehydrogenase (ubiquinone) flavoprotein 1, 51kDa
NF1	neurofibromin 1
NFATC1	nuclear factor of activated T-cells, cytoplasmic, calcineurin-dependent 1
NFE2L2	nuclear factor (erythroid-derived 2)-like 2
NFKB1	nuclear factor of kappa light polypeptide gene enhancer in B-cells 1
NFS1	NFS1 nitrogen fixation 1 homolog (S. cerevisiae)
NKX3-1	NK3 homeobox 1
NOS1	nitric oxide synthase 1 (neuronal)
NOS2	nitric oxide synthase 2, inducible
NOS3	nitric oxide synthase 3 (endothelial cell)
NOX5	NADPH oxidase, EF-hand calcium binding domain 5
NPEPPS	hypothetical protein FLJ11822; aminopeptidase puromycin sensitive
NPL	N-acetylneuraminate pyruvate lyase (dihydrodipicolinate synthase)
NPM1	nucleophosmin 1 (nucleolar phosphoprotein B23, numatrin) pseudogene 21; hypothetical LOC100131044; similar to nucleophosmin 1; nucleophosmin (nucleolar phosphoprotein B23, numatrin)
NQO1	NAD(P)H dehydrogenase, quinone 1
NR1I2	nuclear receptor subfamily 1, group I, member 2
NR1I3	nuclear receptor subfamily 1, group I, member 3
NR3C1	nuclear receptor subfamily 3, group C, member 1 (glucocorticoid receptor)
NR3C2	nuclear receptor subfamily 3, group C, member 2
NTRK2	neurotrophic tyrosine kinase, receptor, type 2
NUF2	NUF2, NDC80 kinetochore complex component, homolog (S. cerevisiae)
OAT	ornithine aminotransferase (gyrate atrophy)
OAZ3	ornithine decarboxylase antizyme 3
ODC1	ornithine decarboxylase 1
OLR1	oxidized low density lipoprotein (lectin-like) receptor 1
OPRD1	opioid receptor, delta 1
OPRM1	opioid receptor, mu 1
P4HB	prolyl 4-hydroxylase, beta polypeptide
PAFAH1B3	platelet-activating factor acetylhydrolase, isoform Ib, subunit 3 (29kDa)
PAM	peptidylglycine alpha-amidating monooxygenase
PARP1	poly (ADP-ribose) polymerase 1
PARP4	poly (ADP-ribose) polymerase family, member 4
PBLD	phenazine biosynthesis-like protein domain containing
PCCA	propionyl Coenzyme A carboxylase, alpha polypeptide
PCK1	phosphoenolpyruvate carboxykinase 1 (soluble)
PCNA	proliferating cell nuclear antigen
PCOLCE	procollagen C-endopeptidase enhancer
PCYT1A	phosphate cytidylyltransferase 1, choline, alpha
PDE3A	phosphodiesterase 3A, cGMP-inhibited
PDX1	pancreatic and duodenal homeobox 1
PFKFB1	6-phosphofructo-2-kinase/fructose-2,6-biphosphatase 1
PFKFB4	6-phosphofructo-2-kinase/fructose-2,6-biphosphatase 4
PFKM	phosphofructokinase, muscle
PGA4	similar to Pepsin A precursor; pepsinogen 3, group I (pepsinogen A); pepsinogen 4, group I (pepsinogen A)
PGD	phosphogluconate dehydrogenase
PGR	progesterone receptor
PHOSPHO1	phosphatase, orphan 1
PIK3CG	phosphoinositide-3-kinase, catalytic, gamma polypeptide
PIM1	pim-1 oncogene
PIPOX	pipecolic acid oxidase
PKIA	protein kinase (cAMP-dependent, catalytic) inhibitor alpha
PKLR	pyruvate kinase, liver and RBC
PLA2G1B	phospholipase A2, group IB (pancreas)
PLA2G2E	phospholipase A2, group IIE
PLAT	plasminogen activator, tissue
PLAU	plasminogen activator, urokinase
PLG	plasminogen
PLK1	polo-like kinase 1 (Drosophila)
PNP	nucleoside phosphorylase
PON1	paraoxonase 1
POR	P450 (cytochrome) oxidoreductase
PPARA	peroxisome proliferator-activated receptor alpha
PPARD	peroxisome proliferator-activated receptor delta
PPARG	peroxisome proliferator-activated receptor gamma
PPARGC1B	peroxisome proliferator-activated receptor gamma, coactivator 1 beta
PPP3CA	protein phosphatase 3 (formerly 2B), catalytic subunit, alpha isoform
PRDX2	peroxiredoxin 2
PRKACA	protein kinase, cAMP-dependent, catalytic, alpha
PRKCA	protein kinase C, alpha
PRKCB	protein kinase C, beta
PRKCG	protein kinase C, gamma
PRKCZ	protein kinase C, zeta
PRSS1	protease, serine, 1 (trypsin 1); trypsinogen C
PRSS3	protease, serine, 3
PSMA1	proteasome (prosome, macropain) subunit, alpha type, 1
PSMD3	proteasome (prosome, macropain) 26S subunit, non-ATPase, 3
PTEN	phosphatase and tensin homolog; phosphatase and tensin homolog pseudogene 1
PTGER3	prostaglandin E receptor 3 (subtype EP3)
PTGES	prostaglandin E synthase
PTGIS	prostaglandin I2 (prostacyclin) synthase
PTGS1	prostaglandin-endoperoxide synthase 1 (prostaglandin G/H synthase and cyclooxygenase)
PTGS2	prostaglandin-endoperoxide synthase 2 (prostaglandin G/H synthase and cyclooxygenase)
PTPN6	protein tyrosine phosphatase, non-receptor type 6
PYCR1	pyrroline-5-carboxylate reductase 1
PYCR2	pyrroline-5-carboxylate reductase family, member 2
PYGM	phosphorylase, glycogen, muscle
PYY	peptide YY
QRSL1	glutaminyl-tRNA synthase (glutamine-hydrolyzing)-like 1
RAC1	ras-related C3 botulinum toxin substrate 1 (rho family, small GTP binding protein Rac1)
RAD51	RAD51 homolog (RecA homolog, E. coli) (S. cerevisiae)
RAF1	v-raf-1 murine leukemia viral oncogene homolog 1
RASA1	RAS p21 protein activator (GTPase activating protein) 1
RASGRF1	Ras protein-specific guanine nucleotide-releasing factor 1
RASSF1	Ras association (RalGDS/AF-6) domain family member 1
RASSF5	Ras association (RalGDS/AF-6) domain family member 5
RB1	retinoblastoma 1
RBM45	RNA binding motif protein 45
RBP2	retinol binding protein 2, cellular
RDH11	retinol dehydrogenase 11 (all-trans/9-cis/11-cis)
RDH13	retinol dehydrogenase 13 (all-trans/9-cis)
RDH5	retinol dehydrogenase 5 (11-cis/9-cis)
RELA	v-rel reticuloendotheliosis viral oncogene homolog A (avian)
REN	renin
RHO	rhodopsin
RHOA	ras homolog gene family, member A
RNASE1	ribonuclease, RNase A family, 1 (pancreatic)
RUNX1T1	runt-related transcription factor 1; translocated to, 1 (cyclin D-related)
RUNX2	runt-related transcription factor 2
RXRA	retinoid X receptor, alpha
RXRB	retinoid X receptor, beta
SCD	stearoyl-CoA desaturase (delta-9-desaturase)
SCLY	selenocysteine lyase
SDHA	succinate dehydrogenase complex, subunit A, flavoprotein (Fp)
SELE	selectin E
SELP	selectin P (granule membrane protein 140kDa, antigen CD62)
SERPINE1	serpin peptidase inhibitor, clade E (nexin, plasminogen activator inhibitor type 1), member 1
SERTAD3	SERTA domain containing 3
SFN	stratifin
SHMT1	serine hydroxymethyltransferase 1 (soluble)
SHMT2	serine hydroxymethyltransferase 2 (mitochondrial)
SIRT1	sirtuin (silent mating type information regulation 2 homolog) 1 (S. cerevisiae)
SIRT5	sirtuin (silent mating type information regulation 2 homolog) 5 (S. cerevisiae)
SLC22A18	solute carrier family 22, member 18
SLC22A5	solute carrier family 22 (organic cation/carnitine transporter), member 5
SLC25A10	solute carrier family 25 (mitochondrial carrier; dicarboxylate transporter), member 10
SLC25A12	solute carrier family 25 (mitochondrial carrier, Aralar), member 12
SLC25A13	solute carrier family 25, member 13 (citrin)
SLC25A29	solute carrier family 25, member 29
SLC2A1	solute carrier family 2 (facilitated glucose transporter), member 1
SLC2A4	solute carrier family 2 (facilitated glucose transporter), member 4
SLC36A1	solute carrier family 36 (proton/amino acid symporter), member 1
SLC6A2	solute carrier family 6 (neurotransmitter transporter, noradrenalin), member 2
SLC6A4	solute carrier family 6 (neurotransmitter transporter, serotonin), member 4
SLPI	secretory leukocyte peptidase inhibitor
SOAT1	sterol O-acyltransferase 1
SOD1	superoxide dismutase 1, soluble
SOD2	superoxide dismutase 2, mitochondrial
SPP1	secreted phosphoprotein 1
SPR	sepiapterin reductase (7,8-dihydrobiopterin:NADP+ oxidoreductase)
SRC	v-src sarcoma (Schmidt-Ruppin A-2) viral oncogene homolog (avian)
STAT1	signal transducer and activator of transcription 1, 91kDa
STAT3	signal transducer and activator of transcription 3 (acute-phase response factor)
SULT1E1	sulfotransferase family 1E, estrogen-preferring, member 1
TBXA2R	thromboxane A2 receptor
TEP1	telomerase-associated protein 1
TFF1	trefoil factor 1
TGFB1	transforming growth factor, beta 1
TGFB1I1	transforming growth factor beta 1 induced transcript 1
TGM3	transglutaminase 3 (E polypeptide, protein-glutamine-gamma-glutamyltransferase)
THBD	thrombomodulin
TIMP1	TIMP metallopeptidase inhibitor 1
TLR2	toll-like receptor 2
TNF	tumor necrosis factor (TNF superfamily, member 2)
TNFRSF1B	tumor necrosis factor receptor superfamily, member 1B
TNFSF13B	tumor necrosis factor (ligand) superfamily, member 13b
TOP2A	topoisomerase (DNA) II alpha 170kDa
TP53	tumor protein p53
TPO	thyroid peroxidase
TREH	trehalase (brush-border membrane glycoprotein)
TRPC3	transient receptor potential cation channel, subfamily C, member 3
TRPM2	transient receptor potential cation channel, subfamily M, member 2
TRPM5	transient receptor potential cation channel, subfamily M, member 5
TXNRD1	thioredoxin reductase 1; hypothetical LOC100130902
TYR	tyrosinase-like (pseudogene); tyrosinase (oculocutaneous albinism IA)
TYRP1	tyrosinase-related protein 1
UCP2	uncoupling protein 2 (mitochondrial, proton carrier)
UCP3	uncoupling protein 3 (mitochondrial, proton carrier)
VCAM1	vascular cell adhesion molecule 1
VCP	valosin-containing protein
VEGFA	vascular endothelial growth factor A
WARS	tryptophanyl-tRNA synthetase
XDH	xanthine dehydrogenase
