# Supplementary material for: Modular Characteristics and Mechanism of Action of Herbs for Endometriosis Treatment in Chinese Medicine: A Data Mining and Network Pharmacology–Based Identification
Source: Front Pharmacol. 2020 Mar 6;11:147. doi: 10.3389/fphar.2020.00147 (PMC7069061; doi:10.3389/fphar.2020.00147)
Supplement: Supplementary Table 9 — Drug targets of endometriosis conventional treatment. [file Table_9.xlsx]

## Sheet: Sheet1
Table 9:The Drug targets of endometriosis conventional treatment
Drug ID(Drug Bank）	Drug name	Target	Type	Uniprot ID	Gene Name	Uniprot Name
DB06719	Buserelin	Lutropin-choriogonadotropic hormone receptor	target	P22888	LHCGR	Lutropin-choriogonadotropic hormone receptor
DB06719	Buserelin	Gonadotropin-releasing hormone receptor	target	P30968	GNRHR	Gonadotropin-releasing hormone receptor
DB06719	Buserelin	Cytochrome P450 19A1	enzyme	P11511	YP19A1	Aromatase
DB01406	Danazol	Estrogen receptor alpha	target	P03372	ESR1	Estrogen receptor
DB01406	Danazol	Androgen receptor	target	P10275	AR	Androgen receptor
DB01406	Danazol	Gonadotropin-releasing hormone receptor	target	P30968	GNRHR	Progesterone receptor
DB01406	Danazol	Progesterone receptor	target	P06401	PGR	Gonadotropin-releasing hormone receptor
DB01406	Danazol	Putative gonadotropin-releasing hormone II receptor	target	Q96P88	GNRHR2	Putative gonadotropin-releasing hormone II receptor
DB01406	Danazol	C-C motif chemokine 2	target	P13500	CCL2	C-C motif chemokine 2
DB01406	Danazol	Cytochrome P450 19A1	enzyme	P11511	CYP19A1	Aromatase
DB01406	Danazol	Cytochrome P450 3A4	enzyme	P08684	CYP3A4	Cytochrome P450 3A4
DB09123	Dienogest	Cytochrome P450 3A4	enzyme	P06401	PGR	Progesterone receptor
DB09123	Dienogest	Progesterone receptor	target	P10275	AR	Androgen receptor
DB09123	Dienogest	Androgen receptor	target	P08684	CYP3A4	Cytochrome P450 3A4
DB01395	Drospirenone	Progesterone receptor	target	P06401	PGR	Progesterone receptor
DB01395	Drospirenone	Mineralocorticoid receptor	target	P08235	NR3C2	Mineralocorticoid receptor
DB01395	Drospirenone	Androgen receptor	target	P10275	AR	Androgen receptor
DB01395	Drospirenone	Prostaglandin G/H synthase 2	enzyme	P35354	PTGS2	Prostaglandin G/H synthase 2
DB01395	Drospirenone	Cholinesterase	enzyme	P06276	BCHE	Cholinesterase
DB01395	Drospirenone	Cytochrome P450 3A4	enzyme	P08684	CYP3A4	Cytochrome P450 3A4
DB00823	Ethynodiol diacetate	Estrogen receptor alpha	target	P06401	PGR	Progesterone receptor
DB00823	Ethynodiol diacetate	Progesterone receptor	target	P03372	ESR1	Estrogen receptor
DB00014	Goserelin	Lutropin-choriogonadotropic hormone receptor	target	P22888	LHCGR	Lutropin-choriogonadotropic hormone receptor
DB00014	Goserelin	Gonadotropin-releasing hormone receptor	target	P30968	GNRHR	Gonadotropin-releasing hormone receptor
DB00007	Leuprolide	Gonadotropin-releasing hormone receptor	target	P30968	GNRHR	Gonadotropin-releasing hormone receptor
DB00603	Medroxyprogesterone acetate	Progesterone receptor	target	P06401	PGR	Progesterone receptor
DB00603	Medroxyprogesterone acetate	Estrogen receptor alpha	target	P03372	ESR1	Estrogen receptor
DB00603	Medroxyprogesterone acetate	Cytochrome P450 3A4	enzyme	P08684	CYP3A4	Cytochrome P450 3A4
DB00603	Medroxyprogesterone acetate	Cytochrome P450 2C8	enzyme	P10632	CYP2C8	Cytochrome P450 2C8
DB00603	Medroxyprogesterone acetate	3 beta-hydroxysteroid dehydrogenase/Delta 5-->4-isomerase type 2	enzyme	P26439	HSD3B2	3 beta-hydroxysteroid dehydrogenase/Delta 5-->4-isomerase type 2
DB00603	Medroxyprogesterone acetate	Cytochrome P450 2C9	enzyme	P11712	CYP2C9	Cytochrome P450 2C9
DB01357	Mestranol	Estrogen receptor alpha	target	P03372	ESR1	Estrogen receptor
DB01357	Mestranol	Cytochrome P450 2C9	enzyme	P11712	CYP2C9	Cytochrome P450 2C9
DB01357	Mestranol	Cytochrome P450 1A2	enzyme	P05177	CYP1A2	Cytochrome P450 1A2
DB00666	Nafarelin	Gonadotropin-releasing hormone receptor	target	P30968	GNRHR	Gonadotropin-releasing hormone receptor
DB00666	Nafarelin	Putative gonadotropin-releasing hormone II receptor	target	Q96P88	GNRHR2	Putative gonadotropin-releasing hormone II receptor
DB00717	Norethisterone	Progesterone receptor	target	P06401	PGR	Progesterone receptor
DB00717	Norethisterone	Cytochrome P450 3A4	enzyme	P08684	CYP3A4	Cytochrome P450 3A4
DB00717	Norethisterone	Cytochrome P450 2C19	enzyme	P20815	CYP3A5	Cytochrome P450 3A5
DB00717	Norethisterone	Cytochrome P450 3A5	enzyme	P20815	CYP3A5	Cytochrome P450 3A5
DB00717	Norethisterone	Cytochrome P450 3A7	enzyme	P24462	CYP3A7	Cytochrome P450 3A7
DB09389	Norgestrel	Progesterone receptor	target	P06401	PGR	Progesterone receptor
DB09389	Norgestrel	3-oxo-5-alpha-steroid 4-dehydrogenase 1	target	P18405	SRD5A1	3-oxo-5-alpha-steroid 4-dehydrogenase 1
DB09389	Norgestrel	Androgen receptor	target	P10275	AR	Androgen receptor
DB09389	Norgestrel	Cytochrome P450 3A4	enzyme	P08684	CYP3A4	Cytochrome P450 3A4
DB09389	Norgestrel	Cytochrome P450 19A1	enzyme	P11511	CYP19A1	Aromatase
DB00788	naproxen	Prostaglandin G/H synthase 1	target	P23219	PTGS1	Prostaglandin G/H synthase 1
DB00788	naproxen	Peptostreptococcal albumin-binding protein	target	Q51911	pab	Peptostreptococcal albumin-binding protein
DB00788	naproxen	Prostaglandin G/H synthase 2	target	P35354	PTGS2	Prostaglandin G/H synthase 2
DB00788	naproxen	Cytochrome P450 2C9	enzyme	P11712	CYP2C9	Cytochrome P450 2C9
DB00788	naproxen	Cytochrome P450 1A2	enzyme	P05177	CYP1A2	Cytochrome P450 1A2
DB00788	naproxen	Cytochrome P450 2C8	enzyme	P10632	CYP2C8	Cytochrome P450 2C8
DB00788	naproxen	UDP-glucuronosyltransferase 1-1	enzyme	P22309	UGT1A1	UDP-glucuronosyltransferase 1-1
DB00788	naproxen	UDP-glucuronosyltransferase 2B7	enzyme	P16662	UGT2B7	UDP-glucuronosyltransferase 2B7
DB01050	Ibuprofen	Prostaglandin G/H synthase 1	target	P35354	PTGS2	Prostaglandin G/H synthase 2
DB01050	Ibuprofen	Prostaglandin G/H synthase 2	target	P23219	PTGS1	Prostaglandin G/H synthase 1
DB01050	Ibuprofen	Apoptosis regulator Bcl-2	target	P10415	BCL2	Apoptosis regulator Bcl-2
DB01050	Ibuprofen	Thrombomodulin	target	P07204	THBD	Thrombomodulin
DB01050	Ibuprofen	Tissue-type plasminogen activator	target	P00750	PLAT	Tissue-type plasminogen activator
DB01050	Ibuprofen	Fatty acid-binding protein, intestinal	target	P12104	FABP2	Fatty acid-binding protein, intestinal
DB01050	Ibuprofen	Peroxisome proliferator-activated receptor gamma	target	P37231	PPARG	Peroxisome proliferator-activated receptor gamma
DB01050	Ibuprofen	Cystic fibrosis transmembrane conductance regulator	target	P13569	CFTR	Cystic fibrosis transmembrane conductance regulator
DB01050	Ibuprofen	Solute carrier family 15 member 1	target	P46059	SLC15A1	Solute carrier family 15 member 1
DB01050	Ibuprofen	Peroxisome proliferator-activated receptor alpha	target	Q07869	PPARA	Peroxisome proliferator-activated receptor alpha
DB01050	Ibuprofen	Cytochrome P450 2C9	enzyme	P11712	CYP2C9	Cytochrome P450 2C9
DB01050	Ibuprofen	Cytochrome P450 2C8	enzyme	P10632	CYP2C8	Cytochrome P450 2C8
DB01050	Ibuprofen	Cytochrome P450 2C19	enzyme	P33261	CYP2C19	Cytochrome P450 2C19
DB01050	Ibuprofen	UDP-glucuronosyltransferase 1-1	enzyme	P22309	UGT1A1	UDP-glucuronosyltransferase 1-1
DB01050	Ibuprofen	UDP-glucuronosyltransferase 1-3	enzyme	P35503	UGT1A3	UDP-glucuronosyltransferase 1-3
DB01050	Ibuprofen	UDP-glucuronosyltransferase 1-9	enzyme	O60656	UGT1A9	UDP-glucuronosyltransferase 1-9
DB01050	Ibuprofen	UDP-glucuronosyltransferase 2B4	enzyme	P06133	UGT2B4	UDP-glucuronosyltransferase 2B4
DB01050	Ibuprofen	UDP-glucuronosyltransferase 2B7	enzyme	P16662	UGT2B7	UDP-glucuronosyltransferase 2B7
DB01050	Ibuprofen	Prostaglandin G/H synthase 1	enzyme	P23219	PTGS1	Prostaglandin G/H synthase 1
DB01050	Ibuprofen	Prostaglandin G/H synthase 2	enzyme	P35354	PTGS2	Prostaglandin G/H synthase 2
DB00784	Mefenamic acid	Prostaglandin G/H synthase 2	target	P35354	PTGS2	Prostaglandin G/H synthase 2
DB00784	Mefenamic acid	Prostaglandin G/H synthase 1	target	P23219	PTGS1	Prostaglandin G/H synthase 1
DB00784	Mefenamic acid	Cytochrome P450 2C9	enzyme	P11712	CYP2C9	Cytochrome P450 2C9
DB00784	Mefenamic acid	Cytochrome P450 2C8	enzyme	P10632	CYP2C8	Cytochrome P450 2C8
DB06730	Gestodene	Probable G-protein coupled receptor 133	target	Q6QNK2	ADGRD1	Adhesion G-protein coupled receptor D1
DB06730	Gestodene	Cytochrome P450 3A5	enzyme	P20815	CYP3A5	Cytochrome P450 3A5
DB06730	Gestodene	Cytochrome P450 3A7	enzyme	P24462	CYP3A7	Cytochrome P450 3A7
DB00367	Levonorgestrel	Progesterone receptor	target	P06401	PGR	Progesterone receptor
DB00367	Levonorgestrel	3-oxo-5-alpha-steroid 4-dehydrogenase 1	target	P18405	SRD5A1	3-oxo-5-alpha-steroid 4-dehydrogenase 1
DB00367	Levonorgestrel	Estrogen receptor alpha	target	P03372	ESR1	Estrogen receptor
DB00367	Levonorgestrel	Androgen receptor	target	P10275	AR	Androgen receptor
DB00367	Levonorgestrel	Sex hormone-binding globulin	target	P04278	SHBG	Sex hormone-binding globulin
DB00367	Levonorgestrel	Cytochrome P450 3A4	enzyme	P08684	CYP3A4	Cytochrome P450 3A4
DB00367	Levonorgestrel	Cytochrome P450 19A1	enzyme	P11511	CYP19A1	Aromatase
DB00603	Medroxyprogesterone acetate	Progesterone receptor	target	P06401	PGR	Progesterone receptor
DB00603	Medroxyprogesterone acetate	Estrogen receptor alpha	target	P03372	ESR1	Estrogen receptor
DB00603	Medroxyprogesterone acetate	Cytochrome P450 3A4	enzyme	P08684	CYP3A4	Cytochrome P450 3A4
DB00603	Medroxyprogesterone acetate	Cytochrome P450 2C8	enzyme	P10632	CYP2C8	Cytochrome P450 2C8
DB00603	Medroxyprogesterone acetate	3 beta-hydroxysteroid dehydrogenase/Delta 5-->4-isomerase type 2	enzyme	P26439	HSD3B2	3 beta-hydroxysteroid dehydrogenase/Delta 5-->4-isomerase type 2
DB00603	Medroxyprogesterone acetate	Cytochrome P450 2C9	enzyme	P11712	CYP2C9	Cytochrome P450 2C9
DB00834	Mifepristone	Progesterone receptor	target	P06401	PGR	Progesterone receptor
DB00834	Mifepristone	Glucocorticoid receptor	target	P04150	NR3C1	Glucocorticoid receptor
DB00834	Mifepristone	Prostate-specific antigen	target	P07288	KLK3	Prostate-specific antigen
DB00834	Mifepristone	Nuclear receptor subfamily 1 group I member 2	target	O75469	NR1I2	Nuclear receptor subfamily 1 group I member 2
DB00834	Mifepristone	Cytochrome P450 3A4	enzyme	P08684	CYP3A4	Cytochrome P450 3A4
DB00834	Mifepristone	Cytochrome P450 3A5	enzyme	P20815	CYP3A5	Cytochrome P450 3A5
DB00834	Mifepristone	Cytochrome P450 3A7	enzyme	P24462	CYP3A7	Cytochrome P450 3A7
DB00834	Mifepristone	Cytochrome P450 2D6	enzyme	P10635	CYP2D6	Cytochrome P450 2D6
DB00834	Mifepristone	Cytochrome P450 1A2	enzyme	P05177	CYP1A2	Cytochrome P450 1A2
DB00957	Norgestimate	Progesterone receptor	target	P06401	PGR	Progesterone receptor
DB00957	Norgestimate	Estrogen receptor alpha	target	P03372	ESR1	Estrogen receptor
DB00957	Norgestimate	Androgen receptor	target	P10275	AR	Androgen receptor
DB00957	Norgestimate	Cytochrome P450 3A4	enzyme	P08684	CYP3A4	Cytochrome P450 3A4
DB11619	Gestrinone	Sex hormone-binding globulin	target	P04278	SHBG	Sex hormone-binding globulin
DB11619	Gestrinone	Progesterone receptor	target	P06401	PGR	Progesterone receptor
DB11619	Gestrinone	Glucocorticoid receptor	target	P10275	AR	Androgen receptor
DB11619	Gestrinone	Androgen receptor	target	P10275	AR	Androgen receptor
DB11619	Gestrinone	Estrogen receptor alpha	target	P03372	ESR1	Estrogen receptor
DB11619	Gestrinone	Gonadotropin-releasing hormone receptor	target	P30968	GNRHR	Gonadotropin-releasing hormone receptor
DB00675	Tamoxifen	Estrogen receptor alpha	target	P03372	ESR1	Estrogen receptor
DB00675	Tamoxifen	Estrogen receptor beta	target	Q92731	ESR2	Estrogen receptor beta
DB00675	Tamoxifen	3-beta-hydroxysteroid-Delta(8),Delta(7)-isomerase	target	Q15125	EBP	3-beta-hydroxysteroid-Delta(8),Delta(7)-isomerase
DB00675	Tamoxifen	Protein kinase C (Protein Group)	target	P17252		Protein kinase C alpha type
DB00675	Tamoxifen	Protein kinase C (Protein Group)	target	P05771		Protein kinase C beta type
DB00675	Tamoxifen	Protein kinase C (Protein Group)	target	Q05655		Protein kinase C delta type
DB00675	Tamoxifen	Protein kinase C (Protein Group)	target	Q02156		Protein kinase C epsilon type
DB00675	Tamoxifen	Protein kinase C (Protein Group)	target	P05129		Protein kinase C gamma type
DB00675	Tamoxifen	Protein kinase C (Protein Group)	target	P41743		Protein kinase C iota type
DB00675	Tamoxifen	Protein kinase C (Protein Group)	target	Q04759		Protein kinase C theta type
DB00675	Tamoxifen	Protein kinase C (Protein Group)	target	Q05513		Protein kinase C zeta type
DB00675	Tamoxifen	Androgen receptor	target	P10275	AR	Androgen receptor
DB00675	Tamoxifen	Potassium voltage-gated channel subfamily H member 2	target	Q12809	KCNH2	Potassium voltage-gated channel subfamily H member 2
DB00675	Tamoxifen	Nuclear receptor subfamily 1 group I member 2	target	O75469	NR1I2	Nuclear receptor subfamily 1 group I member 2
DB00675	Tamoxifen	Estrogen-related receptor gamma	target	P62508	ESRRG	Estrogen-related receptor gamma
DB00675	Tamoxifen	Sex hormone-binding globulin	target	P04278	SHBG	Sex hormone-binding globulin
DB00675	Tamoxifen	Cytochrome P450 2D6	enzyme	P10635	CYP2D6	Cytochrome P450 2D6
DB00675	Tamoxifen	Cytochrome P450 3A4	enzyme	P08684	CYP3A4	Cytochrome P450 3A4
DB00675	Tamoxifen	Cytochrome P450 3A5	enzyme	P20815	CYP3A5	Cytochrome P450 3A5
DB00675	Tamoxifen	Cytochrome P450 3A7	enzyme	P24462	CYP3A7	Cytochrome P450 3A7
DB00675	Tamoxifen	Cytochrome P450 2C9	enzyme	P11712	CYP2C9	Cytochrome P450 2C9
DB00675	Tamoxifen	Cytochrome P450 2C19	enzyme	P33261	CYP2C19	Cytochrome P450 2C19
DB00675	Tamoxifen	Cytochrome P450 2B6	enzyme	P20813	CYP2B6	Cytochrome P450 2B6
DB00675	Tamoxifen	Cytochrome P450 1A1	enzyme	P04798	CYP1A1	Cytochrome P450 1A1
DB00675	Tamoxifen	Cytochrome P450 1A2	enzyme	P05177	CYP1A2	Cytochrome P450 1A2
DB00675	Tamoxifen	Cytochrome P450 1B1	enzyme	Q16678	CYP1B1	Cytochrome P450 1B1
DB00675	Tamoxifen	Dimethylaniline monooxygenase [N-oxide-forming] 1	enzyme	Q01740	FMO1	Dimethylaniline monooxygenase [N-oxide-forming] 1
DB00675	Tamoxifen	Dimethylaniline monooxygenase [N-oxide-forming] 3	enzyme	P31513	FMO3	Dimethylaniline monooxygenase [N-oxide-forming] 3
DB00675	Tamoxifen	Cytochrome P450 2C8	enzyme	P10632	CYP2C8	Cytochrome P450 2C8
DB00675	Tamoxifen	Liver carboxylesterase 1	enzyme	P23141	CES1	Liver carboxylesterase 1
DB00675	Tamoxifen	Cytochrome P450 19A1	enzyme	P11511	CYP19A1	Aromatase
DB00675	Tamoxifen	Cytochrome P450 2A6	enzyme	P11509	CYP2A6	Cytochrome P450 2A6
DB00675	Tamoxifen	Cytochrome P450 2E1	enzyme	P05181	CYP2E1	Cytochrome P450 2E1
DB00675	Tamoxifen	UDP-glucuronosyltransferase 1-10	enzyme	Q9HAW8	UGT1A10	UDP-glucuronosyltransferase 1-10
DB00675	Tamoxifen	Sulfotransferase 1A1	enzyme	P50225	SULT1A1	Sulfotransferase 1A1
DB01006	Letrozole	Cytochrome P450 19A1	target	P11511	CYP19A1	Aromatase
DB01006	Letrozole	Cytochrome P450 19A1	enzyme	P11511	CYP19A1	Aromatase
DB01006	Letrozole	Cytochrome P450 3A4	enzyme	P08684	CYP3A4	Cytochrome P450 3A4
DB01006	Letrozole	Cytochrome P450 2A6	enzyme	P11509	CYP2A6	Cytochrome P450 2A6
DB01217	Anastrozole	Cytochrome P450 19A1	target	P11511	CYP19A1	Aromatase
DB01217	Anastrozole	Cytochrome P450 19A1	enzyme	P11511	CYP19A1	Aromatase
DB01217	Anastrozole	Cytochrome P450 1A2	enzyme	P05177	CYP1A2	Cytochrome P450 1A2
DB01217	Anastrozole	Cytochrome P450 2C9	enzyme	P11712	CYP2C9	Cytochrome P450 2C9
DB01217	Anastrozole	Cytochrome P450 3A4	enzyme	P08684	CYP3A4	Cytochrome P450 3A4
DB00666	Nafarelin	Gonadotropin-releasing hormone receptor	target	P30968	GNRHR	Gonadotropin-releasing hormone receptor
DB00667	Nafarelin	Putative gonadotropin-releasing hormone II receptor	target	Q96P88	GNRHR2	Putative gonadotropin-releasing hormone II receptor
DB00823	Ethynodiol diacetate	Progesterone receptor	target	P06401	PGR	Progesterone receptor
DB00823	Ethynodiol diacetate	Estrogen receptor alpha	target	P03372	ESR1	Estrogen receptor
DB00717	Norethisterone	Progesterone receptor	target	P06401	PGR	Progesterone receptor
DB00717	Norethisterone	Cytochrome P450 3A4	enzyme	P08684	CYP3A4	Cytochrome P450 3A4
DB00717	Norethisterone	Cytochrome P450 3A5	enzyme	P20815	CYP3A5	Cytochrome P450 3A5
DB00717	Norethisterone	Cytochrome P450 3A7	enzyme	P24462	CYP3A7	Cytochrome P450 3A7
DB00717	Norethisterone	Cytochrome P450 2C19	enzyme	P33261	CYP2C19	Cytochrome P450 2C19
DB00304	desogestrel	Estrogen receptor alpha	target	P06401	PGR	Progesterone receptor
DB00304	desogestrel	Progesterone receptor	target	P03372	ESR1	Estrogen receptor
DB06789	hydroxyprogesterone caproate	Progesterone receptor	target	P06401	PGR	Progesterone receptor
DB06789	hydroxyprogesterone caproate	Cytochrome P450 3A5	enzyme	P08684	CYP3A4	Cytochrome P450 3A4
DB06789	hydroxyprogesterone caproate	Cytochrome P450 3A4	enzyme	P20815	CYP3A5	Cytochrome P450 3A5
DB06789	hydroxyprogesterone caproate	Cytochrome P450 2C19	enzyme	P33261	CYP2C19	Cytochrome P450 2C19
DB00065	infliximab	Tumor necrosis factor	target	P01375	TNF	Tumor necrosis factor
DB00806	Pentoxifylline	cAMP-specific 3',5'-cyclic phosphodiesterase 4B	target	Q07343	PDE4B	cAMP-specific 3',5'-cyclic phosphodiesterase 4B
DB00806	Pentoxifylline	Adenosine receptor A1	target	P30542	ADORA1	Adenosine receptor A1
DB00806	Pentoxifylline	cGMP-specific 3',5'-cyclic phosphodiesterase	target	O76074	PDE5A	cGMP-specific 3',5'-cyclic phosphodiesterase
DB00806	Pentoxifylline	cAMP-specific 3',5'-cyclic phosphodiesterase 4A	target	P27815	PDE4A	cAMP-specific 3',5'-cyclic phosphodiesterase 4A
DB00806	Pentoxifylline	Adenosine receptor A2a	target	P29274	ADORA2A	Adenosine receptor A2a
DB00806	Pentoxifylline	5'-nucleotidase	target	P21589	NT5E	5'-nucleotidase
DB00806	Pentoxifylline	Cytochrome P450 1A2	enzyme	P05177	CYP1A2	Cytochrome P450 1A2
